# Supplementary material for: The impacts of recent drought on fire, forest loss, and regional smoke emissions in lowland Bolivia
Source: Copernicus journal article supplement (doi:10.5194/bg-15-4317-2018), 2018-07-17
Supplement: Supplementary file 1 [file bg-15-4317-2018-supplement.pdf]

Supplement of Biogeosciences, 15, 4317–4331, 2018  
<https://doi.org/10.5194/bg-15-4317-2018-supplement>  
© Author(s) 2018. This work is distributed under  
the Creative Commons Attribution 4.0 License.

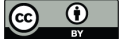

*Supplement of*

## **The impacts of recent drought on fire, forest loss, and regional smoke emissions in lowland Bolivia**

**Joshua P. Heyer et al.**

*Correspondence to:* Joshua P. Heyer ([josh.hey@geog.utah.edu](mailto:josh.hey@geog.utah.edu))

The copyright of individual parts of the supplement might differ from the CC BY 4.0 License.

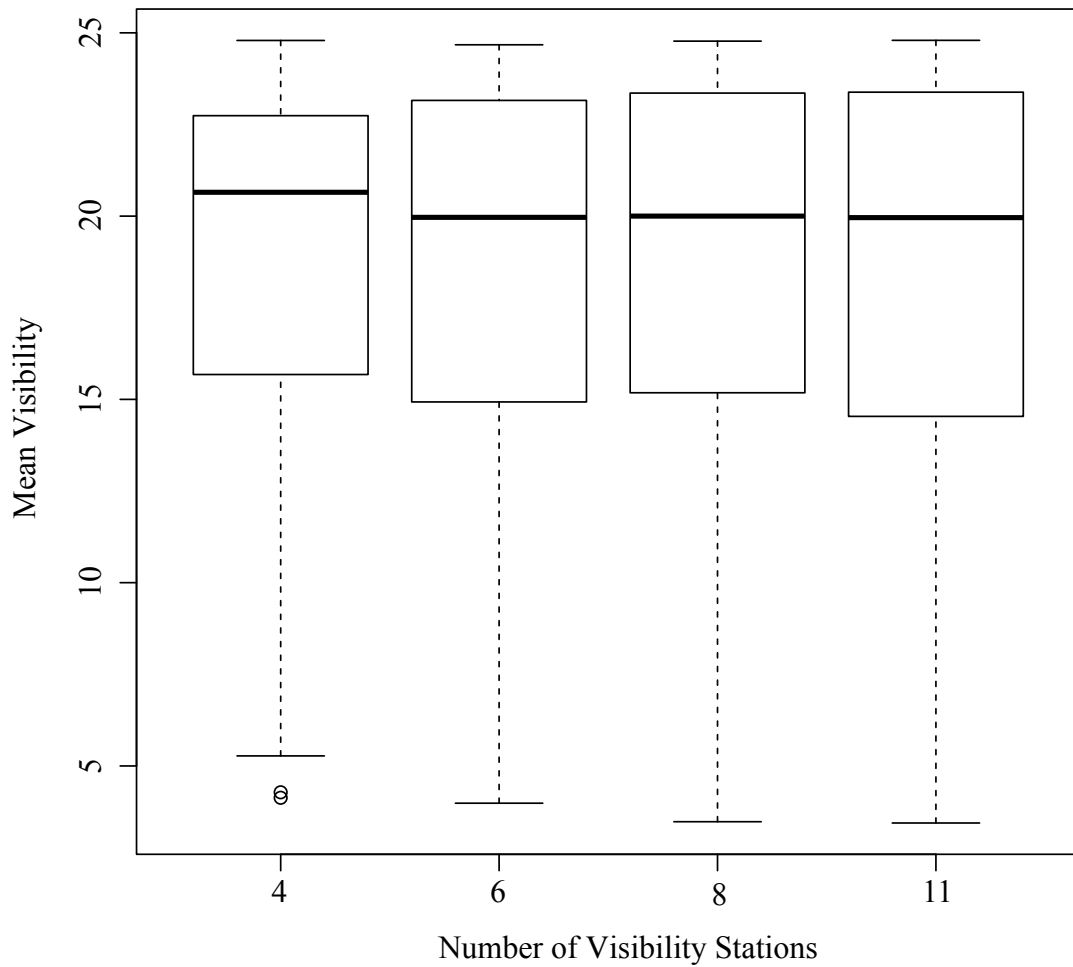

**Figure S1.** An ANOVA test was performed between four mean-monthly visibility timeseries (01/1973–12/2015) to explore variation between sample means. The mean-monthly visibility timeseries are derived from 4 stations, 6 stations, 8 stations, and 11 stations in Bolivia. Both the boxplot and an low F-statistic of .464 indicate the group means are very similar, and therefore increasing or decreasing the number of weather stations did not significantly change mean-monthly visibility data.
